# Supplementary material for: Highly dispersible disk-like graphene nanoflakes
Source: Royal Society of Chemistry journal article supplement (doi:10.1039/c5nr04422g), 2015-01-01

### Highly dispersible disk-like graphene nanoflakes.

V. Georgakilas,<sup>[a]\*</sup> K. Vrettos,<sup>[a]</sup> K. Katomeri,<sup>[a]</sup> A. Kouloumpis,<sup>[b]</sup> K. Dimos,<sup>[b]</sup> D. Gournis,<sup>[b]</sup> Radek Zboril.<sup>[c]</sup>

#### Supplementary material

Figure S1. AFM images and high profiles of the disk like graphene nanoflakes isolated by centrifugation at 13000 rpm.

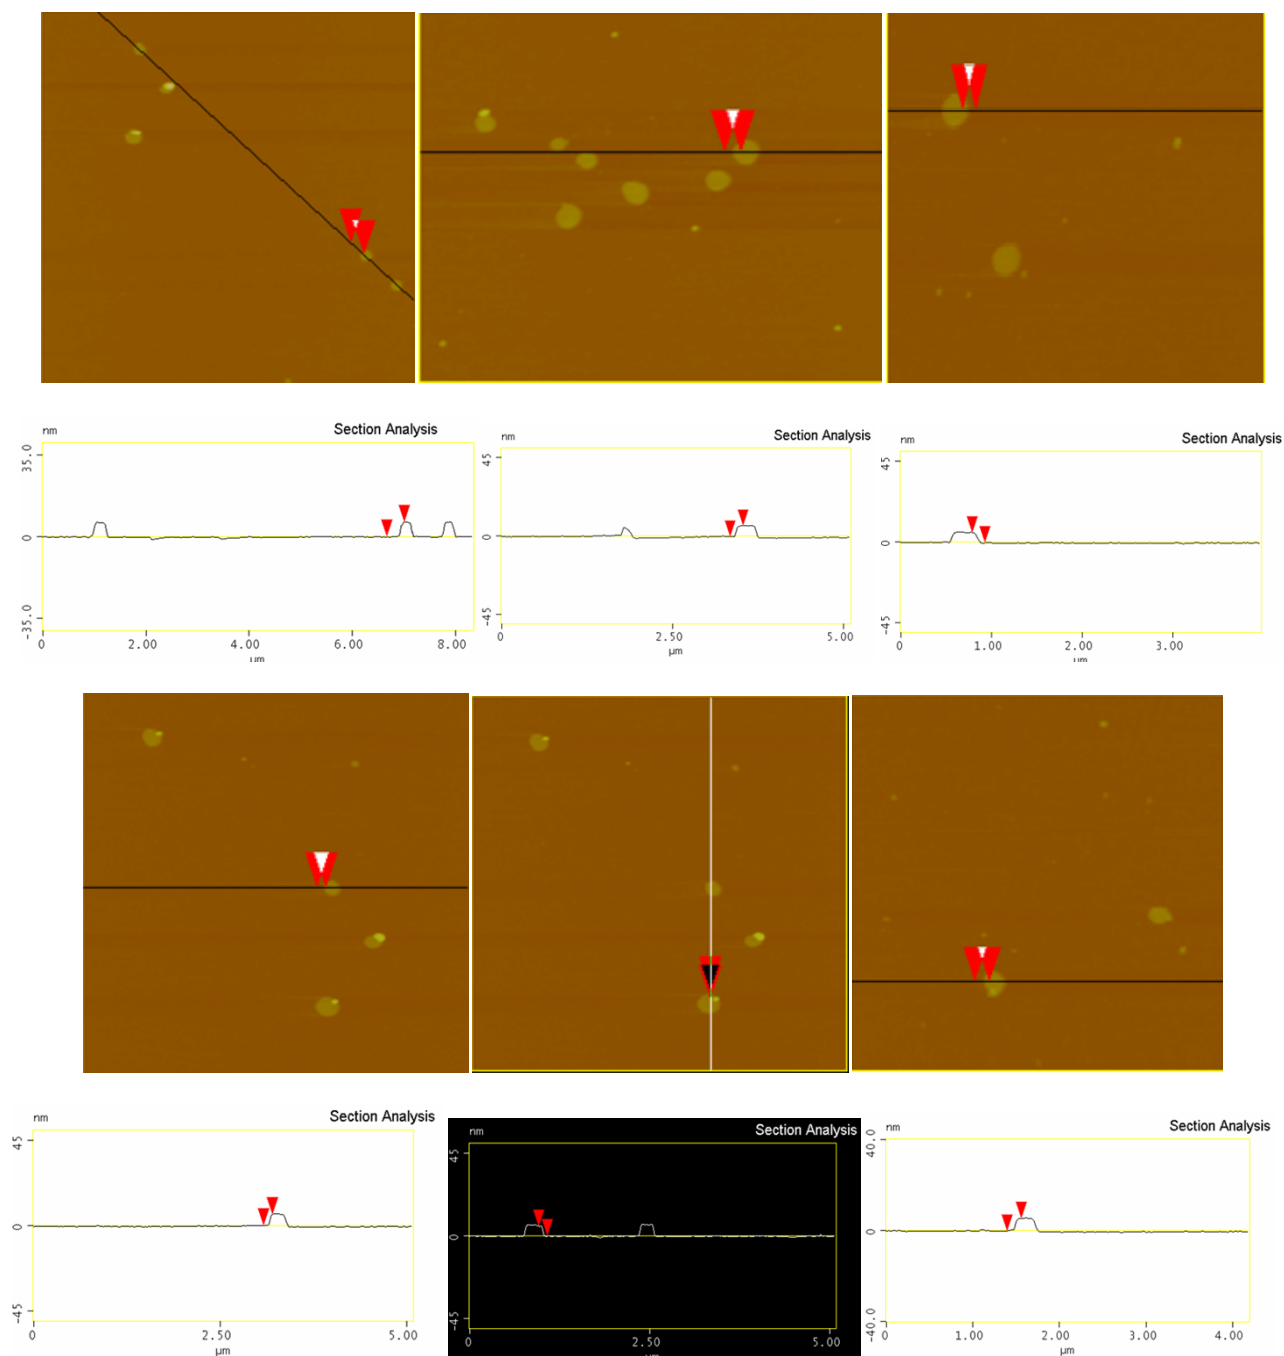

Figure S2. SEM images of disk like graphene nanoflakes isolated by centrifugation at 13000 rpm.

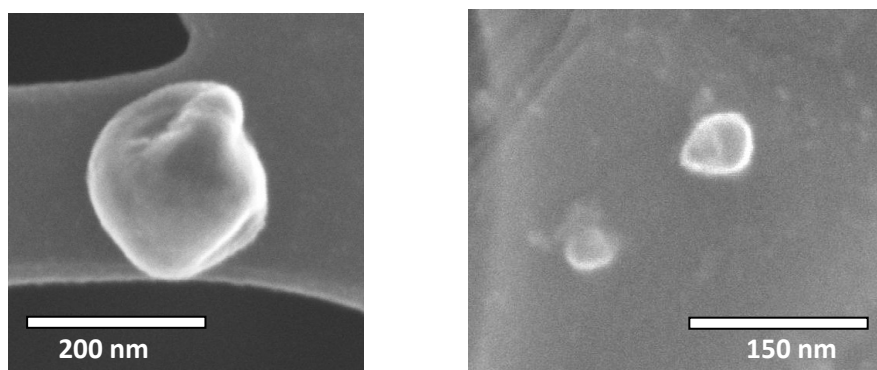

Figure S3. AFM image of disk like nanoflakes isolated by centrifugation at 15000 rpm.

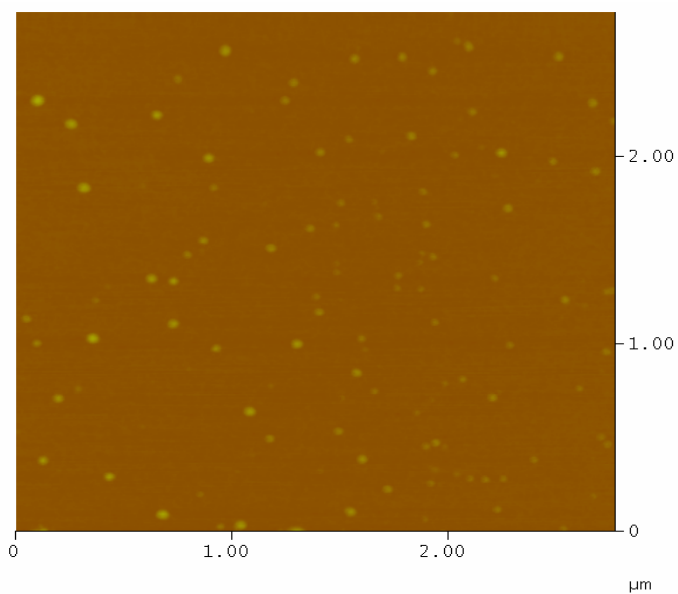

Figure S4. AFM image of disk like nanoflakes isolated by centrifugation at 8000 rpm.

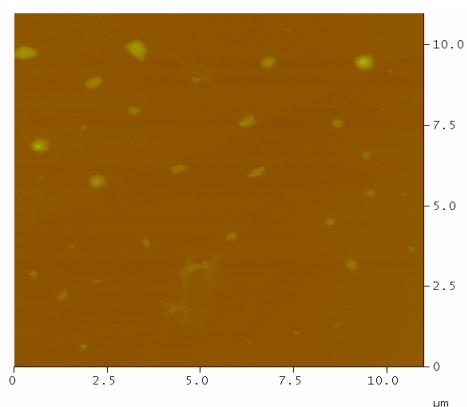

Figure S5. SEM image of disk like nanoflakes isolated by centrifugation at 8000 rpm.

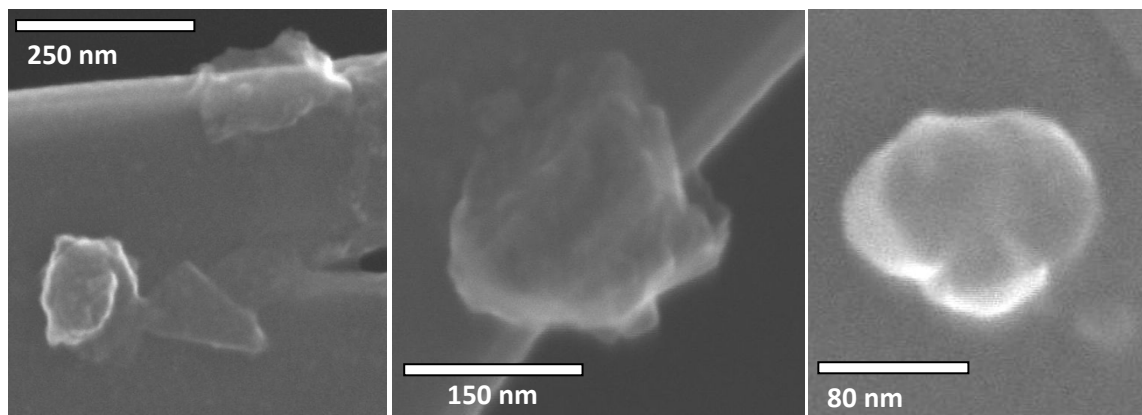

Supplement: c5nr04422g1.pdf [file c5nr04422g1.pdf]
